1 **Letter / Feature / Short communication**

2

3 **Title: COVID-19 vaccination did not improve employee mental health: A prospective**  
4 **study in an early phase of vaccination in Japan**

5

6 Running title: COVID-19 vaccination and mental health

7

8

9 Authors.

10 Natsu Sasaki (MD)<sup>1</sup>, [nasasaki-ky@umin.ac.jp](mailto:nasasaki-ky@umin.ac.jp)

11 Reiko Kuroda (MD, Ph.D.)<sup>2</sup>, [urk@ohs.adm.u-tokyo.ac.jp](mailto:urk@ohs.adm.u-tokyo.ac.jp)

12 Kanami Tsuno (Ph.D.)<sup>3</sup>, [ktsuno-ky@umin.ac.jp](mailto:ktsuno-ky@umin.ac.jp)

13 Kotaro Imamura (Ph.D.)<sup>1</sup>, [kouima-ky@umin.ac.jp](mailto:kouima-ky@umin.ac.jp)

14 Norito Kawakami (MD, PhD)<sup>1</sup>, [nkawakami@m.u-tokyo.ac.jp](mailto:nkawakami@m.u-tokyo.ac.jp)

15

16 <sup>1</sup> Department of Mental Health, Graduate School of Medicine, The University of Tokyo, Tokyo,  
17 Japan

18 <sup>2</sup> Division for Environment, Health, and Safety, The University of Tokyo, Tokyo, Japan

19 <sup>3</sup> School of Health Innovation, Kanagawa University of Human Services, Kanagawa, Japan

20

21

22

23 Corresponding author: **Norito Kawakami (MD)**

24 Department of Mental Health, Graduate School of Medicine, The University of Tokyo, Tokyo,  
25 Japan

26 7-3-1, Hongo, Bunkyo-ku, Tokyo, 113-0033, Japan

27 E-mail: [nkawakami@m.u-tokyo.ac.jp](mailto:nkawakami@m.u-tokyo.ac.jp)

28 Telephone: +81-3-5841-3364, Fax: +81-3-5841-3392

29

30

31 **Abstract**

32 The effect of the COVID-19 vaccination as an individual-based preventive measure on mental  
33 health is largely unclear in the literature. The authors report a preliminary finding on whether  
34 vaccination effectively improves mental health among employees in Japan based on a  
35 prospective study (E-COCO-J). Of the total sample (N=948), 105 (11.1%) were vaccinated at  
36 least once at the follow-up survey (June 2021). There was no significant effect of vaccination on  
37 the change of psychological distress at baseline (February 2021) and follow-up (June 2021),  
38 after adjusting for gender, age, marital status, education, chronic disease, company size, industry,  
39 and occupation (healthcare workers or non-HCWs). Providing continuous mental health care for  
40 employees is important in an early vaccination phase.

41  
42  
43

44 **DISCLOSURE**

45 **Approval of the research protocol:** This study was approved by the Research Ethics  
46 Committee of the Graduate School of Medicine/Faculty of Medicine, The University of Tokyo,  
47 No. 10856-(2)(3)(4)(5).

48

49 **Informed consent:** Online informed consent was obtained from all participants with full  
50 disclosure and explanation of the purpose and procedures of this study. We explained that their  
51 participation was voluntary, and they can withdraw consent for any reason, simply by not  
52 completing the questionnaire.

53

54 **Registry and registration number of the study/trial:** N/A.

55

56 **Animal studies:** N/A.

57

58 **Conflict of interest:** NK reports grants from SB AtWork Corp, Fujitsu Ltd, and TAK Ltd,  
59 personal fees from the Occupational Health Foundation, SB AtWork Corp, RIKEN, Japan  
60 Aerospace Exploration Agency (JAXA), Japan Dental Association, Sekisui Chemicals, Junpukai  
61 Health Care Center, Osaka Chamber of Commerce and Industry, outside the submitted work.

62

63 **Funding/Support:** This work was supported by the 2021 Health, Labour and Welfare Policy  
64 Research Grants, The Japan Ministry of Health, Labour, and Welfare and an internal fund of the  
65 Department of Mental Health, Graduate School of Medicine, The University of Tokyo.

66

67 **Role of the Funder/Sponsor:** The sponsors had no role in the design and conduct of the study;  
68 collection, management, analysis, and interpretation of the data; in the preparation, review, or  
69 approval of the manuscript; and in the decision to submit the manuscript for publication.

70

71 **Author contribution:** NK was in charge of this study, supervising the process and of providing  
72 his expert opinion. NS and NK organized the study design and analyzed the data. Collaborators  
73 RK, KT and KI ensured that questions related to the accuracy or integrity of any part of the  
74 work were appropriately investigated and resolved. All authors participated in conducting the  
75 survey. NS and NK wrote the first draft of the manuscript, and all other authors critically revised  
76 it. All authors approved the final version of the manuscript.

77

78 **Manuscript**

79 Deteriorated mental health is a major public health concern during the COVID-19 pandemic  
80 among working populations, including healthcare workers (HCWs) and non-HCWs, and the  
81 community overall <sup>1</sup>. Vaccination is considered an effective individual-based preventive  
82 measure to control the COVID-19 epidemic <sup>2</sup>. People adopted individual-based preventive  
83 measures, such as hand-washing, wearing masks, and others, to cope with fear and worry about  
84 COVID-19 <sup>3</sup>. Using a COVID-19 contact tracking app was associated with better mental health  
85 <sup>4</sup>. However, the effect of the COVID-19 vaccination as an individual-based preventive measure  
86 on mental health is largely unclear in the literature. We thus report a preliminary finding on  
87 whether vaccination effectively improves mental health among employees in Japan based on a  
88 prospective study.

89         The data were retrieved from the Employee Cohort Study conducted during the Covid-  
90 19 pandemic in Japan (E- COCO-J) <sup>5,6</sup>. The Research Ethics Committee of The University of  
91 Tokyo approved this study (No. 10856-(2)(3)(4)(5)). We measured psychological distress using  
92 an 18-item scale of the Brief Job Stress Questionnaire (BJSQ) [possible range: 18 - 72] <sup>7</sup> at T1  
93 (4 - 10 February 2021) and T2 (22 - 29 June 2021). We limited the analytic sample to  
94 individuals employed at both T1 and T2 without missing covariates. In Japan, priority  
95 vaccination for HCWs began on February 17, followed by people over 65 and people with

96 chronic diseases. Vaccination programs started on June 21 in a few workplaces.

97           Of the total sample (N=948), 105 (11.1%) were vaccinated at least once at T2.

98 Participants vaccinated at least once were more likely to be females ( $p<0.001$ ), employed in a

99 company with 300-999 employees ( $p=0.007$ ), work in the medical and welfare industry

100 ( $p<0.001$ ), and attain college/vocational education ( $p<0.001$ ). Proportions of vaccinated

101 participants were higher for healthcare workers (HCWs) ( $n=56/103$ : 54.4%) than for non-HCWs

102 ( $n=47/817$ : 5.8%) and participants with unknown occupation ( $n=2/28$ : 7.1%) ( $df=2$ ,  $p<0.001$ ).

103 Differences between vaccinated and non-vaccinated participants in age, marital status, and

104 chronic physical condition were non-significant.

105           The crude mean scores (standard deviations, SDs) of psychological distress at T1 and

106 T2 were 41.8 (10.9) and 42.0 (11.9) for vaccinated participants and 41.2 (11.4) and 41.2 (11.6)

107 for non-vaccinated participants, respectively, with no significant effect of having been

108 vaccinated (Cohen's  $d=0.02$ ,  $p=0.833$  for the time x group interaction by repeated ANOVA).

109 After adjusting for gender, age, marital status, education, chronic disease, company size,

110 industry, and occupation (HCWs or non-HCWs), the estimated mean scores (standard errors,

111 SEs) of psychological distress at T1 and T2 were 41.4 (1.7) and 42.4 (1.8) for vaccinated

112 participants and 43.3 (1.2) and 43.4 (1.2) for non-vaccinated participants, respectively, with no

113 significant effect ( $p=0.446$ ).

114           Our study did not show improved psychological distress among participants  
115 vaccinated at least once compared to non-vaccinated individuals immediately after vaccination  
116 started in Japan. The findings suggest that vaccination for COVID-19 may not improve workers'  
117 mental health, especially not worsened and sustained psychological distress during COVID-19  
118 outbreaks <sup>5</sup>. An effort to continuously monitor and improve workers' mental health during the  
119 COVID-19 should continue despite vaccination.

120           A previous study reported that people who had higher stress are more likely to use  
121 individual-based preventive behaviors (e.g., washing hands) <sup>8</sup>. Therefore, vaccinated  
122 participants would be expected to have higher stress. However, since we adjusted for  
123 psychological distress before the vaccination in our study, this expectation does not apply to our  
124 findings. Another possible reason is that the study was conducted in an early phase of  
125 vaccination in this country. People may not be fully convinced that the vaccination effectively  
126 reduces the risk of COVID-19 infection. In addition, employees' mental health may be affected  
127 not only by a perceived risk of COVID-19 infection but also by social and economic problems  
128 due to the epidemic.

129           Several limitations should be addressed. The sample was small, comprising full-time  
130 employees recruited via an online platform in Japan. HCWs included employees working in  
131 non-clinical settings. Only a few participants were vaccinated, and some were vaccinated only

132 once. Analyzing samples of fully vaccinated individuals in other countries and another phase of  
133 a pandemic may lead to different conclusions. In conclusion, providing mental health care for  
134 employees is important in an early vaccination phase.

135

136 **Word count: 678 words.**

137

138

139

140 **References.**

- 141 1. Cenat JM, Blais-Rochette C, Kokou-Kpolou CK, et al. Prevalence of symptoms of depression,  
142 anxiety, insomnia, posttraumatic stress disorder, and psychological distress among populations  
143 affected by the COVID-19 pandemic: A systematic review and meta-analysis. *Psychiatry*  
144 *research*. 2021;295:113599.
- 145 2. Thompson MG, Burgess JL, Naleway AL, et al. Interim estimates of vaccine effectiveness of  
146 BNT162b2 and mRNA-1273 COVID-19 vaccines in preventing SARS-CoV-2 infection among  
147 health care personnel, first responders, and other essential and frontline workers—eight US  
148 locations, December 2020–March 2021. *Morbidity and Mortality Weekly Report*.  
149 2021;70(13):495.
- 150 3. Ministry of Health L, and Welfare. The results of the national mental health survey in the  
151 COVID-19 pandemic (Japanese). 2020; [https://www.mhlw.go.jp/stf/newpage\\_15790.html](https://www.mhlw.go.jp/stf/newpage_15790.html).  
152 Accessed 12, July, 2021.
- 153 4. Kawakami N, Sasaki N, Kuroda R, Tsuno K, Imamura K. The Effects of Downloading a  
154 Government-Issued COVID-19 Contact Tracing App on Psychological Distress During the  
155 Pandemic Among Employed Adults: Prospective Study. *JMIR Ment Health*. 2021;8(1):e23699.
- 156 5. Sasaki N, Asaoka H, Kuroda R, Tsuno K, Imamura K, Kawakami N. Sustained poor mental  
157 health among healthcare workers in COVID-19 pandemic: A longitudinal analysis of the  
158 four-wave panel survey over 8 months in Japan. *Journal of occupational health*.  
159 2021;63(1):e12227.
- 160 6. Sasaki N, Kuroda R, Tsuno K, Kawakami N. The deterioration of mental health among  
161 healthcare workers during the COVID-19 outbreak: A population-based cohort study of workers  
162 in Japan. *Scandinavian journal of work, environment & health*. 2020;46(6):639-644.
- 163 7. Inoue A, Kawakami N, Shimomitsu T, et al. Development of a short version of the new brief job  
164 stress questionnaire. *Industrial health*. 2014;52(6):535-540.

- 165 8. Newby JM, O'Moore K, Tang S, Christensen H, Faasse K. Acute mental health responses during  
166 the COVID-19 pandemic in Australia. *PloS one*. 2020;15(7):e0236562.  
167
